# Supplementary material
Source: publisher figshare collection journal article supplement (https://acs.figshare.com/ndownloader/files/18028493)
Supplement: Supplementary file 1 [file 18028493]

## **Supporting Information**

### **DFT Studies on the Al-Speciation and Its Structure in Aqueous Aluminum Sol Formed by Aluminum Formoacetate**

*Chunlan Li, Wensheng Liu and Yunzhu Ma\**

National Key Laboratory of Science and Technology for National Defence on  
High-strength Structural Materials, Central South University, Changsha 410083,  
China

\*Corresponding Authors: Yunzhu Ma ([zhuzipm@csu.edu.cn](mailto:zhuzipm@csu.edu.cn))

Tel: +86 731 88877825; Fax: +86 731 88836800

**Table S1:** Gibbs free energy of isomers for aluminum formoacetate in aqueous solution

| Species | Gibbs free energy/hartree | $\Delta G$ / kJ·mol <sup>-1</sup> |
|---------|---------------------------|-----------------------------------|
| Al-1    | -736.235068               | 0.0                               |
| Al-2    | -736.225577               | 24.9                              |
| Al-3    | -736.217557               | 46.0                              |
| Al-4    | -736.195249               | 104.6                             |

**Table S2:** Gibbs free energies of Al-1 and its dimerization products in aqueous solution

| Species               | Gibbs free energy/hartree | $\Delta G$ / kJ·mol <sup>-1</sup> |
|-----------------------|---------------------------|-----------------------------------|
| Al-1+ Al-1            | -1472.470136              | 0.0                               |
| P-Al-1-IM1            | -1472.478688              | -22.5                             |
| i-P-Al-1-IM1 (isomer) | -1472.519250              | -129.0                            |
| d-Al-1 (isomer)       | -1472.523035              | -139.0                            |

**Table S3:** Gibbs free energies of d-Al-1 and its polymerization products in aqueous solution

| Species                 | Gibbs free energy/hartree | $\Delta G$ / kJ·mol <sup>-1</sup> |
|-------------------------|---------------------------|-----------------------------------|
| d-Al-1+ d-Al-1          | -2945.046070              | 0.0                               |
| P-d-Al-1-IM1            | -2945.047057              | -2.6                              |
| i-P-d-Al-1-IM1 (isomer) | -2945.077119              | -81.6                             |

**Table S4:** Gibbs free energies of isomers for aluminum formoacetate in acidic aqueous solution

| Species    | Gibbs free energy/hartree | $\Delta G$ / kJ·mol <sup>-1</sup> |
|------------|---------------------------|-----------------------------------|
| Al-1-H (a) | -736.622972               | 0.0                               |
| Al-1-H (b) | -736.623484               | -1.3                              |
| Al-1-H (c) | -736.639092               | -42.3                             |

**Table S5:** Gibbs free energies of hydrolysis product H-3H<sub>2</sub>O-IM3 and its polymerization products in aqueous solution

| Species                                               | Gibbs free energy/hartree | $\Delta G$ / kJ·mol <sup>-1</sup> |
|-------------------------------------------------------|---------------------------|-----------------------------------|
| H-3H <sub>2</sub> O-IM3-1 + H-3H <sub>2</sub> O-IM3-1 | -1552.418844              | 0.0                               |
| P-H-3H <sub>2</sub> O-IM3-1-IM4                       | -1552.423606              | -12.5                             |
| d-Al-1-H-1(isomer)                                    | -1552.453120              | -90.0                             |
| d-Al-1-H-2 (isomer)                                   | -1552.445321              | -69.5                             |

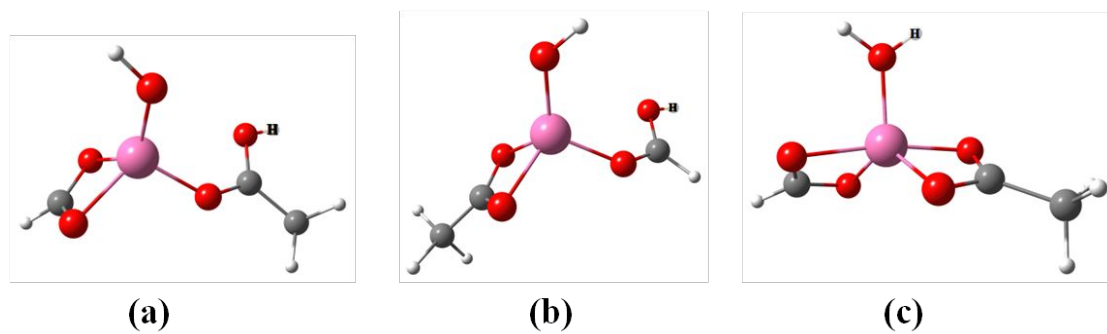

**Figure S1.** Optimized structures of isomers for Al-1-H in aqueous solution.

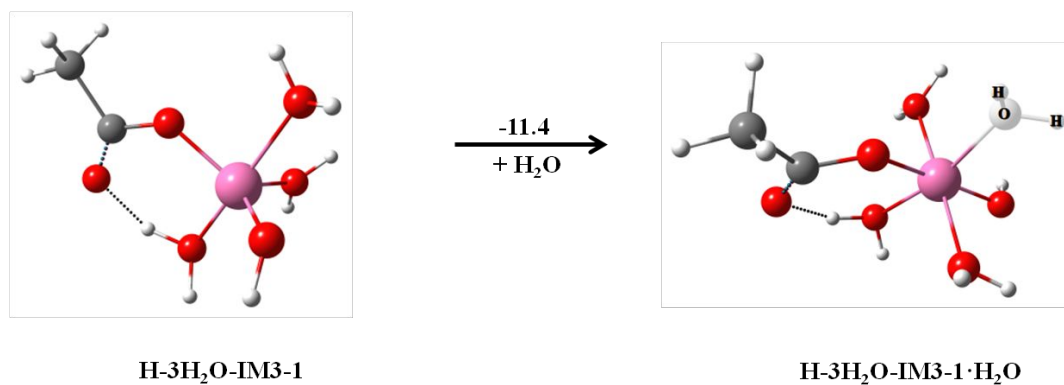

**Figure S2.** Optimized structures and relative energies of H-3H<sub>2</sub>O-IM3-1·H<sub>2</sub>O in aqueous solution.
